# Supplementary material
Source: publisher site journal article supplement (https://www.degruyterbrill.com/publication/dbid/lex/downloadAsset/LEX_LEX_Paul%20Raabe--de.pdf)
Supplement: Supplementary file 1 [file LEX_LEX_Paul%20Raabe--de.pdf]

Paul Raabe

## Der literarische Expressionismus und seine Veröffentlichungen

Der Expressionismus war vor fast 100 Jahren zwischen 1910 und 1920 eine gesamt künstlerische Bewegung im deutschen Sprachraum, an der Maler und Bildhauer, Dichter und Schriftsteller, Musiker und Theaterleute beteiligt waren. Diese letzte große Avantgarde wollte eine neue Kunst, einen neuen Menschen, eine neue Welt und richtete sich gegen das wilhelminische Kaiserreich, das satte Bürgertum, die Kunst des 19. Jahrhunderts. Sie revoltierte gegen die Traditionen und sehnte sich nach einer neuen Gemeinschaft und gerechter sozialer Ordnung. Diese geistige Bewegung war am Ende einer langen Friedensepoche unter dem Einfluss der französischen Moderne in Malerei und Dichtung entstanden. Sie erlebte vor 1914 in Deutschland nur eine kurze Blüte, bevor sie von dem mörderischen Ersten Weltkrieg überschattet wurde, den die Künstler und Dichter vorausgeahnt hatten und den sie nun miterleben mussten. Auf die Novemberrevolution 1918 setzten sie utopische Hoffnungen, schrieben Manifeste und Proklamationen, nutzten das Theater als politische Bühne und stellten dann ernüchtert fest: „Expressionismus war eine schöne, gute, große Sache. Solidarität der Geistigen, Aufmarsch der Wahrhaftigen. Aber das Resultat ist leider, und ohne Schuld der Expressionisten, die deutsche Republik 1920“ (Iwan Goll).

Der literarische Expressionismus entstand in Berlin ein halbes Jahrzehnt nach der „Brücke“, dem Zusammenschluss der modernen Maler in Dresden 1905. Das berühmte Gedicht des Jakob van Hoddis „Weltende“ („Dem Bürger fliegt vom spitzen Kopf der Hut ...“) und die Berlin-Gedichte von Georg Heym, vorgetragen im Neuen Club und Neopathetischen Cabarett, die Kurt Hiller 1909/10 mit Freunden gegründet hatte, markieren den literarischen Aufbruch einer neuen Jugend. „Die Jüngst-Berliner“, wie dieser die Gruppe 1912 nannte – „Wir sind Expressionisten. Es kommt uns wieder auf das Wollen, das Ethos an“ – wurde die Keimzelle einer literarischen Bewegung, die noch vor dem Krieg auf München, Prag und Wien übergriff. Die jungen Autoren, denen sich bald auch ältere anschlossen, schrieben Lyrik. „Dichter singen in die Setzmaschinen“ lautete ein Slogan, und „Sie hassen alles, was nicht Lyrik ist“ ein anderer. Aber auch die ersten Dramen erschienen, in denen sich die Dichter mit ihren Vätern auseinander setzten.

Neue Verlage wurden von bis dahin unbekannten Bücherfreunden gegründet: Ernst Rowohlt, Paul Cassirer, Alfred Richard Meyer in Berlin und Kurt Wolff in Leipzig. Ältere Verlage schlossen sich an: S. Fischer und Axel Juncker in Berlin, später sogar der Insel-Verlag in Leipzig, und bald schossen neue Firmen wie Pilze aus dem Boden, denn als nach dem Kriege endlich die Zensur aufgehoben worden war, hatte sich eine breite Phalanx von Dichtern, Schriftstellern, Kritikern gebildet, die nach Hunderten zählte.

Die jungen Autoren, die meisten zwischen 1884 und 1894 geboren, wurden gefördert durch erfahrene Literaten, Angehörige aus der Generation von Thomas Mann und Hermann Hesse, Hugo von Hofmannsthal und Rainer Maria Rilke. Viele gehörten dem

Kreis der Neuen Gemeinschaft um die Brüder Hart am Schlachtensee bei Berlin an: Gustav Landauer und Erich Mühsam und spätere Wortführer des Expressionismus wie Ferdinand Hardekopf und Ludwig Rubiner. Vor allem aber wurde der Diskurs der Zeit entscheidend befördert durch zwei begabte und zum Risiko bereite Schriftleiter, die dem Kreis um 1900 am Rande angehörten: Herwarth Walden und Franz Pfemfert. Der eine war verheiratet mit der Dichterin Else Lasker-Schüler, die dem musisch Begabten den poetisch klingenden Namen gab, und der andere mit einer aus Russland eingewanderten Jüdin, die ihren Mann zu einem politischen Kämpfer formte. Beide gründeten zwei berühmt gewordene Zeitschriften, die den Autoren des Expressionismus eine publizistische Plattform gaben, die Vorbilder für nachfolgende Blätter wurden und der literarischen Bewegung zum dauernden Ruhm verhalfen.

Die erste Nummer des *Sturm* erschien am 1. März 1910 im Folioformat mit Beiträgen von Else Lasker-Schüler und René Schickele, aus Wien von Karl Kraus und Adolf Loos. Bald wurden Zeichnungen und Holzschnitte von Oskar Kokoschka und den Malern der „Brücke“ und des „Blauen Reiter“ reproduziert, Dichtungen von Alfred Lichtenstein, Albert Ehrenstein und Ernst Wilhelm Lotz, später von August Stramm, Lothar Schreyer und vielen anderen abgedruckt, Beiträge von Paul Scheerbart und Alfred Döblin publiziert und die Zeitschrift zu einem anschaulichen Spiegel des künstlerisch-literarischen Expressionismus, der sich auch durch Polemik und Kritik auszeichnete.

Das gilt ebenso für Franz Pfemferts ein Jahr später erscheinende literarisch-politische Zeitschrift *Die Aktion*, in der Gedichte der jungen Autoren wie Georg Heym und Jakob van Hoddis, Ernst Blass und Franz Werfel erschienen und die Graphik des Expressionismus nach und nach das Gesicht der Zeitschrift prägte. Die beiden führenden Zeitschriften der künstlerisch-literarischen Bewegung unterschieden sich im Profil stark voneinander. Pfemfert verfolgte radikale politische Ziele. Im Kriege veröffentlichte er „Verse vom Schlachtfeld“ und kritisierte den militaristischen Geist in einer Rubrik „Ich schneide die Zeit aus“. Dagegen vertrat Walden einen radikalen künstlerischen Expressionismus im Sinne von August Stramm und seinen Nachfolgern. Beide Zeitschriften bestanden bis 1932, doch ihre führende Rolle in der Literatur und Kunst hatten sie nach 1920 eingebüßt. Beide Herausgeber emigrierten: Walden kam in der Sowjetunion um, Pfemfert starb in Mexiko.

*Der Sturm* und *Die Aktion* wurden die Vorbilder für die 100 neuen Zeitschriften, die vor und nach dem Krieg erschienen. Will man wissen, was der Expressionismus in Literatur und Kunst war, so muss man die Gedichte, Geschichten, Kritiken und Manifeste, Artikel, Glossen dieser Blätter lesen, die den Zeitgeist überliefern. Man erkennt, wie sehr die Zeitschriften Sprachrohr und Sammelbecken der expressionistischen Bewegung wurden. Ihre bekanntesten waren: *Pan*, *Die weißen Blätter*, *Das neue Pathos*, *Der Brenner*. Untrennbar gehörten dann im und nach dem Kriege, als der Expressionismus die Provinz eroberte, die Zeichnungen und Holzschnitte dazu. Sie illustrieren nicht nur die Zeit, sondern drücken die Hoffnungen und Sehnsüchte einer ganzen Generation aus. Die Zeitschriften erschienen in Kiel und Dresden, Hannover und Hamburg, Darmstadt und Konstanz, selbstverständlich auch in Berlin und München, Prag und

Wien. Ihre Titel waren Programm: *Neue Jugend, Menschen, Revolution, Die neue Erde, Das hohe Ufer, Der Friede, Die Rettung, Das Tribunal, Kündigung, Die rote Erde, Die Pleite, Der blutige Ernst* usw.

Schon 1912 erschienen die ersten Anthologien expressionistischer Dichtung als Sonderhefte der Zeitschriften und in Buchform wie *Der Kondor*, den Kurt Hiller herausgab. In den Sammlungen, die im Kriege und danach erschienen, zogen die Herausgeber eine Bilanz der jüngsten Entwicklung, so Franz Pfemfert mit seinem *Aktionsbuch* (1917) und Kurt Pinthus mit seiner *Menschheitsdämmerung* (1919), die er eine „Symphonie jüngster Dichtung“ nannte. Sie ist die berühmteste Anthologie des Expressionismus bis heute geblieben. Daneben gab es andere Jahrbücher, Anthologien, Sammelbände, Textsammlungen: zum Beispiel die *Ziel-Jahrbücher* von Kurt Hiller, deren erster Band (1916) „Aufrufe zu tätigem Geist“ enthält; Alfred Wolfenstein's „Jahrbuch für neue Dichtung und Wertung“ *Die Erhebung* (1919); Herwarth Waldens Sammlung *Expressionismus. Die Kunstwende* (1918); Ludwig Rubiners Anthologie *Kameraden der Menschheit. Dichtungen zur Weltrevolution* (1919); *Verkündigung. Anthologie junger Lyrik*, herausgegeben von Rudolf Kayser (1921) oder die *Verse der Lebenden. Deutsche Lyrik seit 1910* von Heinrich Eduard Jacob (1924) und viele andere.

Der literarische Expressionismus war eine dichterische Bewegung, wie Alfred Döblin sie 1918 in seinem Aufsatz *Von der Freiheit eines Dichtermenschen* beschrieben hat. Das lässt sich in Zahlen ausdrücken: In der kurzen Zeitspanne von 1910 bis 1922/23 erschienen etwa 2.000 Buchveröffentlichungen von mehr als 300 Autoren, Dichtern, Schriftstellern, Mitläufern. Sie publizierten ca. 36.000 Beiträge in den Zeitschriften und Sammlungen, die sich dieser Literatur widmeten. Die Zahl der beteiligten Autoren liegt selbstverständlich bedeutend höher.

Die Epoche des literarischen Expressionismus ist seit der Ausstellung im Schiller-Nationalmuseum Marbach am Neckar, die 1960 Aufsehen erregte, gut erforscht. Die Autoren und ihre Bücher sind in einem bio-bibliographischen Handbuch verzeichnet, viele Editionen liegen vor, die lange verschollenen Zeitschriften und Sammlungen wurden ermittelt und erschlossen. Die vorliegende Datenbank ist das Resultat der Wiederentdeckung des literarischen Expressionismus.

Unter den Dichtern des Expressionismus hat Gottfried Benn 1955 den bewegendsten Nachruf auf eine Epoche geschrieben, die unvergessen sein sollte und an der er selbst beteiligt war: „Also: der Expressionismus und das expressionistische Jahrzehnt: einige über den Kontinent verstreute Gehirne mit einer neuen Realität und mit neuen Neurosen. Stieg auf, schlug seine Schlachten auf allen katalaunischen Gefilden und verfiel. Trug seine Fahne über Bastille, Kreml, Golgatha, nur auf den Olymp gelangte er nicht oder auf anderes klassisches Gelände. Was schreiben wir auf sein Grab? Was man über dies alles schreibt, über alle Leute der Kunst, das heißt der Schmerzen, schreiben wir auf das Grab einen Satz von mir, mit dem ich zum letztenmal ihrer aller gedenke. ‚Du stehst für Reiche, nicht zu deuten, und in denen es keine Siege gibt‘.“
